# Supplementary material for: Glycoproteins Presenting Galactose and N-Acetylgalactosamine in Human Seminal Plasma as Potential Players Involved in Immune Modulation in the Fertilization Process
Source: MDPI journal article supplement (doi:10.3390/ijms22147331), 2021-07-08
Supplement: s1 [file s1]

Table S2. LC-MS identification of proteins isolated in lectin affinity chromatography.

| VVL                                      |       |         |                 |
|------------------------------------------|-------|---------|-----------------|
| Protein identified                       | Score | Matches | Molar mass (Da) |
| Semenogelin-2                            | 2997  | 135     | 65,497          |
| Prolactin-inducible protein              | 1482  | 39      | 16,792          |
| Semenogelin-1                            | 1278  | 49      | 52,146          |
| Lactotransferrin                         | 50    | 16      | 79,650          |
| Cystatin-C                               | 108   | 1       | 15,973          |
| Prostate-specific antigen                | 86    | 2       | 29,183          |
| Fibronectin                              | 67    | 2       | 275,047         |
| Immunoglobulin heavy constant alpha 1    | 64    | 1       | 38,320          |
| Thioredoxin                              | 60    | 1       | 11,960          |
| Filaggrin-2                              | 56    | 1       | 249,032         |
| Prostatic acid phosphatase               | 55    | 1       | 44,813          |
| Beta-microseminoprotein                  | 49    | 1       | 13,362          |
| Metalloproteinase inhibitor 1            | 43    | 1       | 23,707          |
| Aminopeptidase N                         | 43    | 1       | 109,793         |
| Antileukoproteinase                      | 43    | 1       | 15,052          |
| Zinc-alpha-2-glycoprotein                | 40    | 1       | 34,421          |
| MPL                                      |       |         |                 |
| Protein identified                       | Score | Matches | Molar mass (Da) |
| Prolactin-inducible protein              | 9346  | 158     | 16,792          |
| Semenogelin-2                            | 6473  | 159     | 65,497          |
| Semenogelin-1                            | 3895  | 80      | 52,146          |
| Fibronectin                              | 1471  | 28      | 275,047         |
| Lactotransferrin                         | 1440  | 29      | 79,650          |
| Albumin                                  | 897   | 18      | 70,931          |
| Prostate-specific antigen                | 809   | 21      | 29,183          |
| Aminopeptidase N                         | 758   | 16      | 109,793         |
| Prostatic acid phosphatase               | 539   | 11      | 44,813          |
| 60 kDa heat shock protein, mitochondrial | 467   | 5       | 61,154          |
| Cystatin-C                               | 412   | 5       | 15,973          |
| Clusterin                                | 242   | 6       | 52,921          |
| Calmodulin-1                             | 217   | 4       | 16,827          |
| Zinc-alpha-2-glycoprotein                | 179   | 3       | 34,421          |
| Trypsin-3                                | 169   | 3       | 33,152          |
| Cystatin-S                               | 148   | 2       | 16,434          |
| Lysozyme C                               | 138   | 3       | 16,894          |
| Alpha-1-acid glycoprotein 1              | 124   | 2       | 23,681          |
| Cathepsin B                              | 118   | 3       | 38,579          |
| Mucin-6                                  | 117   | 2       | 261,946         |

|                                      |    |   |         |
|--------------------------------------|----|---|---------|
| Cysteine-rich secretory protein 1    | 97 | 2 | 29,244  |
| Midkine                              | 95 | 1 | 16,035  |
| Ubiquitin-40S ribosomal protein S27a | 94 | 1 | 18,229  |
| Glycodelin                           | 92 | 1 | 20,886  |
| Antileukoproteinase                  | 88 | 3 | 15,052  |
| Metalloproteinase inhibitor 1        | 82 | 1 | 282,963 |
| Galectin-7                           | 77 | 2 | 23,707  |
