# Supplementary material for: Glycoproteins Presenting Galactose and N-Acetylgalactosamine in Human Seminal Plasma as Potential Players Involved in Immune Modulation in the Fertilization Process
Source: MDPI journal article supplement (doi:10.3390/ijms22147331), 2021-07-08
Supplement: s1 [file s1]

Table S1. LC-MS protein identification of lectin-reactive bands separated by SDS-PAGE

| Fraction | Protein                                         | Score | Matches | Molar Mass [Da] |
|----------|-------------------------------------------------|-------|---------|-----------------|
| 135 kDa  | Mucin 6                                         | 12688 | 271     | 263,159         |
|          | Aminopeptidase N                                | 8732  | 204     | 109,870         |
|          | Serum albumin                                   | 5456  | 111     | 71,317          |
|          | Fibronectin                                     | 5109  | 111     | 266,052         |
|          | Lactotransferrin                                | 4699  | 96      | 80,014          |
|          | Dipeptidyl peptidase 4                          | 3143  | 75      | 88,907          |
|          | Laminin subunit beta 2                          | 2410  | 56      | 202,982         |
|          | Beta mannosidase                                | 1174  | 31      | 101,800         |
|          | Cation independent mannose 6 phosphate receptor | 984   | 25      | 281,155         |
|          | Neogenin                                        | 864   | 13      | 160,658         |
|          | Nicastrin                                       | 725   | 13      | 79,103          |
| 83 kDa   | Lactotransferrin                                | 43323 | 872     | 83,000          |
|          | Fibronectin                                     | 14382 | 309     | 266,052         |
|          | Serum albumin                                   | 4267  | 108     | 71,317          |
|          | Serotransferrin                                 | 2896  | 78      | 79,294          |
|          | Mucin-6                                         | 2692  | 62      | 263,159         |
|          | Polymeric immunoglobulin receptor               | 1972  | 37      | 84,429          |
|          | Alpha 2 macroglobulin                           | 1049  | 32      | 164,613         |
|          | Calsyntenin-1                                   | 529   | 13      | 110,978         |
|          | Leukemia inhibitory factor receptor             | 465   | 17      | 125,090         |
|          | Neprilysin                                      | 451   | 17      | 86,144          |
|          | Aminopeptidase N                                | 385   | 8       | 109,870         |
|          | Alpha N acetylglucosaminidase                   | 346   | 6       | 82,670          |
|          | Matrix remodelling associated protein 5         | 338   | 7       | 314,065         |
|          | Interleukin 6 receptor subunit beta             | 333   | 12      | 104,498         |
|          | Heat shock protein HSP 90 beta                  | 310   | 9       | 83,554          |
|          | Matrilin 2                                      | 264   | 8       | 110,644         |
|          | Heat shock protein HSP 90 alpha                 | 196   | 7       | 85,006          |
|          | Collectin-12                                    | 186   | 7       | 82,035          |
| 70 kDa   | Serum albumin                                   | 38789 | 946     | 71,317          |
|          | Galectin 3 binding protein                      | 2960  | 59      | 66,202          |
|          | Lactotransferrin                                | 1668  | 44      | 80,014          |
|          | Fibronectin                                     | 1061  | 41      | 266,052         |
|          | Carboxipeptidase Z                              | 640   | 20      | 74,577          |
|          | Mucin-6                                         | 482   | 17      | 263,159         |
|          | Cartilage acidic protein 1                      | 299   | 10      | 72,174          |
|          | Plastin 2                                       | 281   | 8       | 70,814          |
|          | Growth arrest specific protein 6                | 254   | 11      | 81,678          |
|          | Hornerin                                        | 246   | 7       | 283,140         |
|          | Heat shock 70 kDa protein 1A                    | 238   | 6       | 70,294          |
|          | Transketolase                                   | 176   | 4       | 68,519          |
| 53 kDa   | Prostatic acid phosphatase                      | 12624 | 443     | 44,880          |
|          | Alpha 1 antitrypsin                             | 3616  | 139     | 46,878          |
|          | Fibronectin                                     | 1528  | 46      | 266,052         |
|          | Lactotransferrin                                | 1390  | 42      | 80,014          |
|          | Hornerin                                        | 814   | 21      | 283,140         |
|          | Glutathione synthetase                          | 687   | 25      | 52,523          |
|          | IgG Fc binding protein                          | 574   | 19      | 596,443         |

|        |                                                     |       |     |         |
|--------|-----------------------------------------------------|-------|-----|---------|
|        | Extracellular matrix protein 1                      | 493   | 16  | 62,232  |
|        | Mucin 6                                             | 485   | 18  | 263,159 |
|        | Alpha 2 antiplasmin                                 | 434   | 15  | 54,873  |
|        | Vitamin D binding protein                           | 349   | 8   | 54,526  |
|        | Clusterin                                           | 335   | 8   | 53,031  |
|        | Hemopexin                                           | 303   | 5   | 52,385  |
|        | Gluthatione reductase                               | 240   | 5   | 56,791  |
|        | Beta hexosaminidase subunit beta                    | 230   | 10  | 63,527  |
|        | Angiotensinogen                                     | 228   | 7   | 53,406  |
|        | Solute carrier family 2, glucose transporter member | 184   | 6   | 55,394  |
|        | Galectin 3 binding protein                          | 184   | 7   | 66,202  |
|        | Desmoplakin                                         | 172   | 6   | 334,021 |
|        | Aspartyl aminopeptidase                             | 156   | 3   | 53,022  |
| 32 kDa | Fibronectin                                         | 9291  | 221 | 266,052 |
|        | Prostate specific antigen                           | 6171  | 222 | 29,293  |
|        | Annexin                                             | 4182  | 80  | 35,971  |
|        | Clusterin                                           | 2358  | 66  | 53,031  |
|        | Prostatic acid phosphatase                          | 1381  | 35  | 44,880  |
|        | Prosaposin                                          | 1263  | 42  | 59,899  |
|        | Serum albumin                                       | 1098  | 42  | 71,317  |
|        | Carboxypeptidase E                                  | 1059  | 34  | 53,516  |
|        | Cysteine rich secretory protein 1                   | 1026  | 19  | 29,432  |
|        | Purine nucleoside phosphorylase                     | 1010  | 23  | 32,325  |
|        | Lactotransferrin                                    | 891   | 26  | 80,014  |
|        | Protein glutamine gamma glutamyltransferase 4       | 767   | 19  | 77,951  |
|        | Zinc alpha 2 glycoprotein                           | 706   | 17  | 34,465  |
|        | Creatine kinase B type                              | 652   | 12  | 42,902  |
|        | Hornerin                                            | 651   | 20  | 283,140 |
|        | Syntenine 1                                         | 484   | 14  | 32,595  |
|        | Plasma serine protease inhibitor                    | 400   | 16  | 45,760  |
|        | Extracellular matrix protein 1                      | 390   | 10  | 62,232  |
|        | Heat shock protein HSP 90 alpha                     | 373   | 10  | 85,006  |
|        | Sulfhydryl oxidase 1                                | 351   | 13  | 83,324  |
|        | L lactate dehydrogenase B                           | 321   | 5   | 36,900  |
|        | SPARC like protein 1                                | 316   | 8   | 76,017  |
|        | Complement factor B                                 | 300   | 14  | 86,847  |
|        | Immunoglobulin gamma 1 heavy chain                  | 280   | 15  | 49,925  |
|        | Galectin 3 binding protein                          | 253   | 5   | 66,202  |
|        | Mucin 6                                             | 249   | 12  | 263,159 |
|        | Complement C4                                       | 204   | 12  | 194,261 |
|        | Glycodelin                                          | 176   | 4   | 20,953  |
|        | Epididymal sperm binding protein 1                  | 129   | 5   | 27,001  |
|        | Testis expressed protein 101                        | 77    | 1   | 27,504  |
| 15 kDa | Prolactin inducible protein                         | 37959 | 916 | 16,847  |
|        | Peptidyl prolyl cis trans isomerase A               | 1145  | 33  | 18,229  |
|        | Prostatic acid phosphatase                          | 1084  | 37  | 44,880  |
|        | Prosaposin                                          | 992   | 31  | 59,899  |
|        | Serum albumin                                       | 937   | 25  | 71,317  |
|        | Prostate specific antigen                           | 910   | 31  | 29,293  |
|        | Cathelicidin antimicrobial peptide                  | 901   | 32  | 19,517  |

|         |                                       |      |    |         |
|---------|---------------------------------------|------|----|---------|
|         | Fibronectin                           | 814  | 30 | 266,052 |
|         | Ras related protein Rab 3B            | 727  | 17 | 24,970  |
|         | Nucleoside diphosphate kinase B       | 663  | 21 | 17,401  |
|         | Carbonic anhydrase 4                  | 615  | 19 | 35,295  |
|         | Caspase 14                            | 472  | 11 | 27,947  |
|         | Clusterin                             | 441  | 11 | 53,031  |
|         | Nucleoside diphosphate kinase 3       | 431  | 12 | 19,231  |
|         | Elongation factor 1 gamma             | 426  | 10 | 50,429  |
|         | Peroxiredoxin-5, mitochondrial        | 422  | 9  | 22,301  |
|         | Cystatin M                            | 279  | 8  | 16,785  |
|         | Lipocalin 1                           | 268  | 10 | 19,409  |
|         | Cofilin 1                             | 263  | 5  | 18,719  |
|         | Semenogelin 1                         | 241  | 8  | 52,157  |
|         | Cystatin C                            | 239  | 9  | 16,017  |
|         | CD59 glycoprotein                     | 238  | 9  | 14,795  |
|         | Transthyretin                         | 228  | 4  | 15,991  |
|         | Semenogelin 2                         | 143  | 6  | 65,519  |
| <15 kDa | Prolactin inducible protein precursor | 1823 | 39 | 16,847  |
|         | Semenogelin 1 preproprotein           | 1134 | 27 | 52,157  |
|         | Prolactin induced protein             | 1090 | 23 | 9,232   |
|         | Semenogelin 2 precursor               | 1023 | 21 | 65,519  |
|         | Fibronectin isoform 3 preproprotein   | 418  | 8  | 262,656 |
|         | Prostate specific antigen precursor   | 286  | 7  | 28,780  |
